# Supplementary material
Source: Springer Nature journal article supplement (https://www.springermedizin.de/resource/supplementary/12879_2006_369_MOESM3_ESM.pdf/9448524)

● Beijing (n=12)

○ Non-Beijing (n=13)

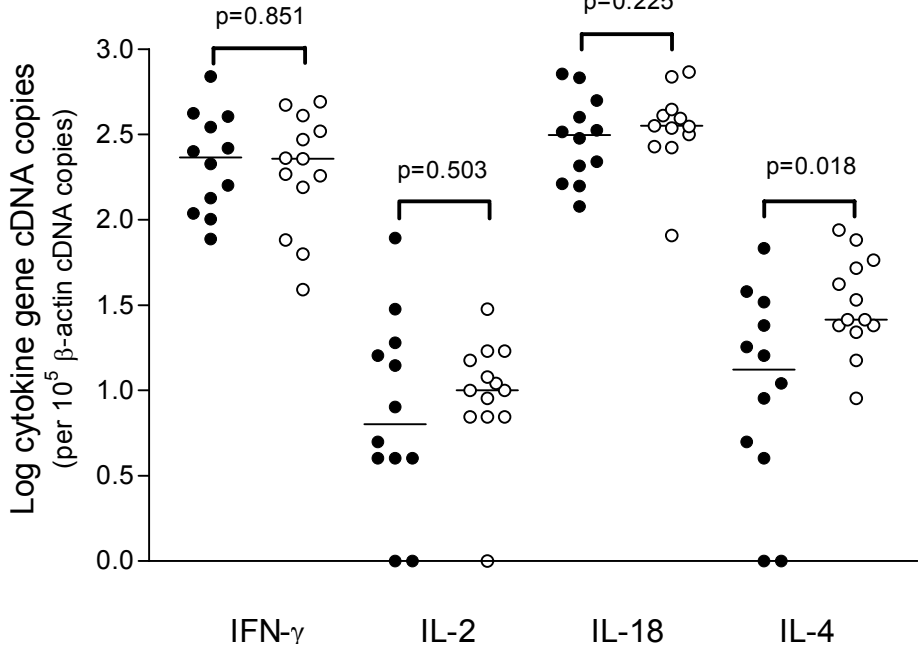

Supplement: MOESM3 [file 9448524]
